# Supplementary material
Source: Springer Nature journal article supplement (https://www.springermedizin.de/resource/supplementary/12879_2013_2710_MOESM1_ESM.pdf/9445212)
Supplement: MOESM1 [file 9445212]

240 received QFT-GIT, T.SPOT, and TST

195 TST negative\*

116 QFT-GIT- / T.SPOT-

22 QFT-GIT- / T.SPOT+

10 QFT-GIT- / T.SPOT ID

26 QFT-GIT+ / T.SPOT-

12 QFT-GIT+ / T.SPOT+

6 QFT-GIT+ / T.SPOT ID

3 QFT-GIT ID / (1 T.SPOT - / 2 T.SPOT+)

41 TST+

13 QFT-GIT+ / T.SPOT+

10 QFT-GIT+ / T.SPOT-

2 QFT-GIT+ / T.SPOT ID

8 QFT-GIT- / T.SPOT-

7 QFT-GIT- / T.SPOT+

1 QFT-GIT- / T.SPOT ID

2 TST invalid
